# Supplementary material for: Towards polymorphism control in coordination networks and metallo-organic salts
Source: Royal Society of Chemistry journal article supplement (doi:10.1039/c0ce00230e), 2010-01-01
Supplement: c0ce00230e.pdf [file c0ce00230e.pdf]

## Towards polymorphism control in coordination networks and metallo-organic salts

Christopher J. Adams, Amy L. Gillon, Matteo Lusi and A. Guy Orpen\*

*School of Chemistry, University of Bristol, Bristol BS8 1TS*

---

### Supplementary information

Pages 2 – 7: Powder XRD patterns

Page 8: TGA of **3**

Pages 9 - 10: SEM images and EDAX maps of **3**<sub>0.5</sub> and **4**<sub>0.5</sub>

Page 11: Details of the crystal structures of **3**<sub>x</sub> with x = 0.95, 0.93 and 0.86

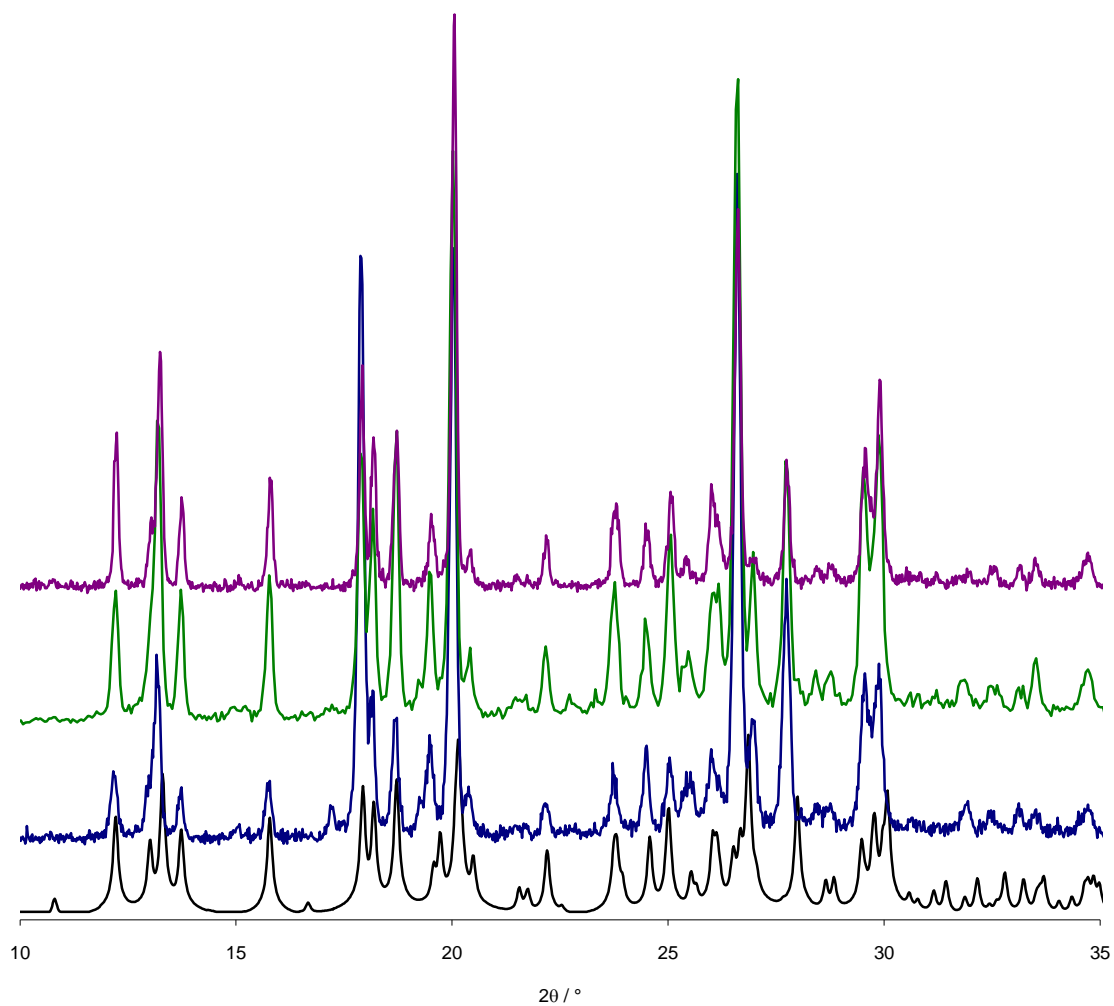

**Figure S1:** PXRD patterns for [4,4'-H<sub>2</sub>bipy][ZnCl<sub>4</sub>] **3**: calculated from the crystal structure (black); solution synthesis (blue, Scheme route (vi)); grinding synthesis (green, Scheme route (vii)); HCl absorption (purple, Scheme route (viii)).

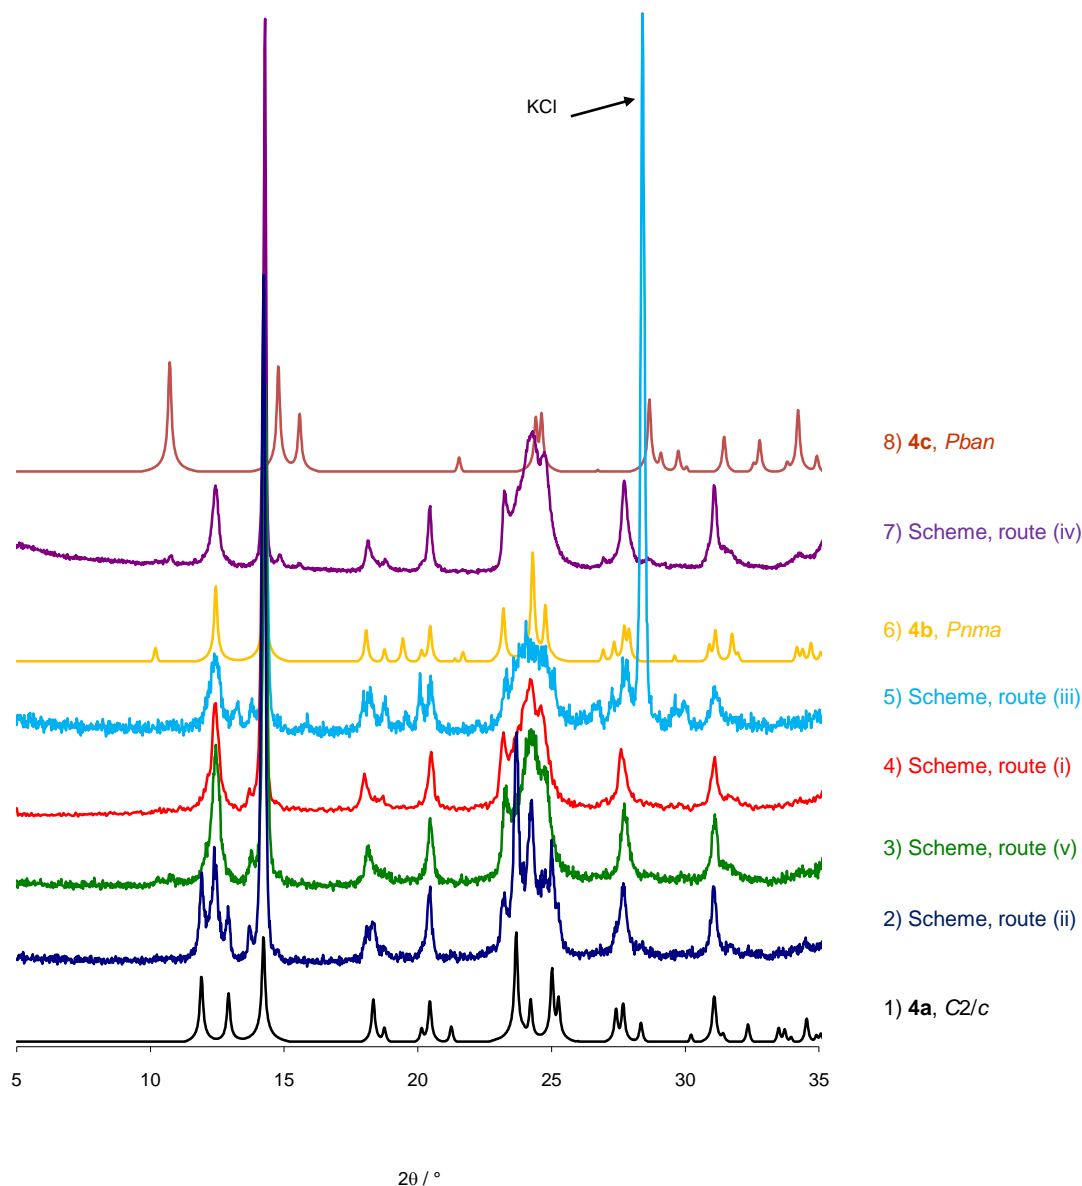

**Figure S2:** Comparison of the PXR D patterns calculated for the various polymorphs of **4** with those measured from the product obtained by various methods: 1) calculated for **4a** (black, *C2/c* phase); 2) solution synthesis (blue, Scheme route (ii)); 3) grinding (green, Scheme route (v)); 4) thermal elimination (red, Scheme route (i)); 5) mechanochemical elimination with KOH (light blue, Scheme route (iii)); 6) calculated for **4b** (yellow, *Pnma* phase); 7) By reaction of [4,4'-H<sub>2</sub>bipy]Cl<sub>2</sub> with basic zinc carbonate (violet, Scheme route (iv)); 8) calculated for **4c** (brown, *Pban* phase).

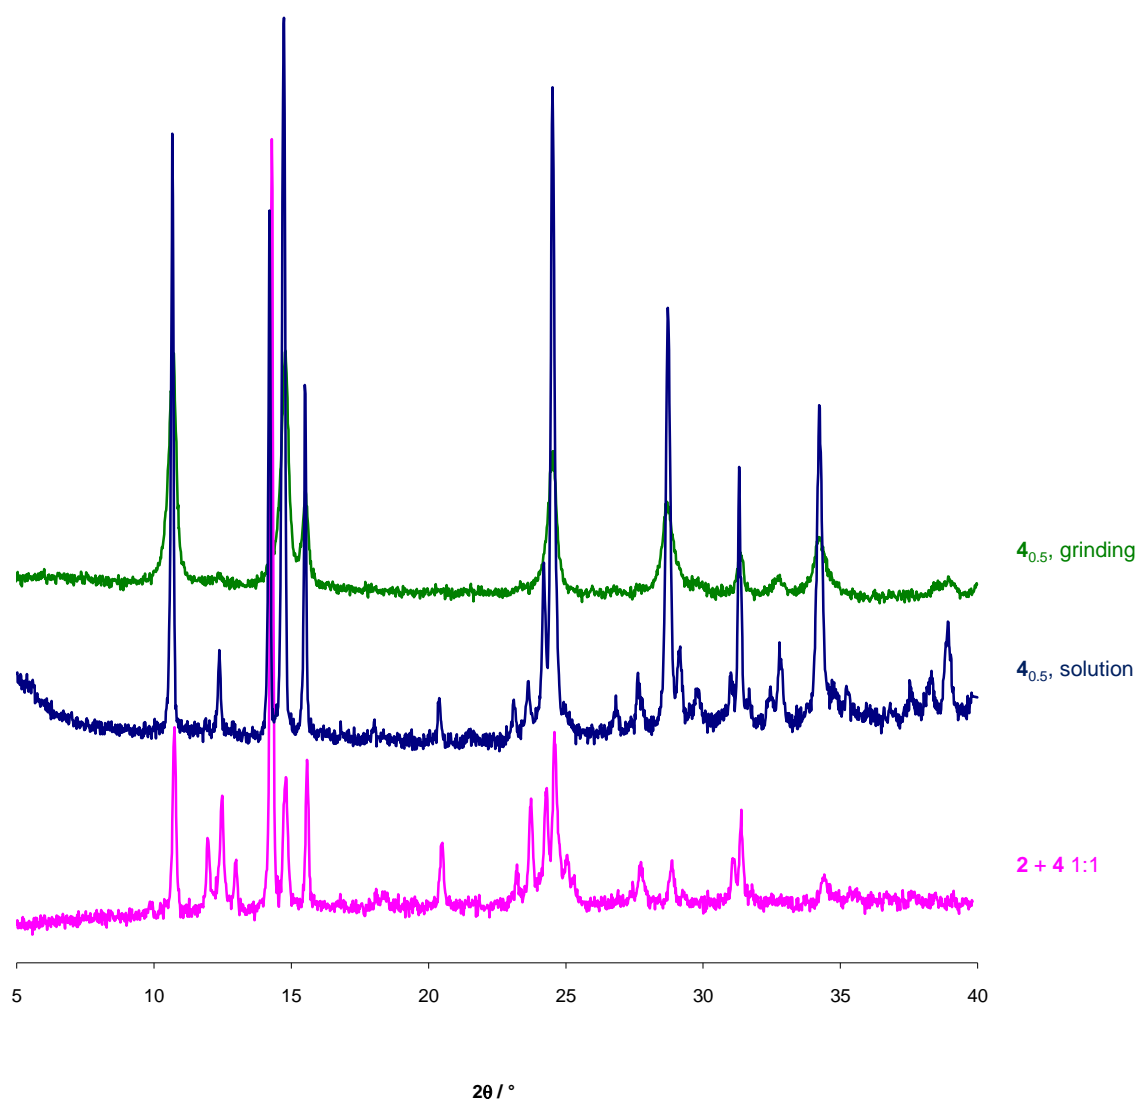

**Figure S3:** Comparison of PXRD patterns measured for different samples: mixing equivalent amounts of **2** and **4** obtained from solution (pink), containing all three phases; solution synthesis of **4**<sub>0.5</sub> (blue), containing phases **4b** and **4c**; grinding synthesis of **4**<sub>0.5</sub> (green), containing just **4c**.

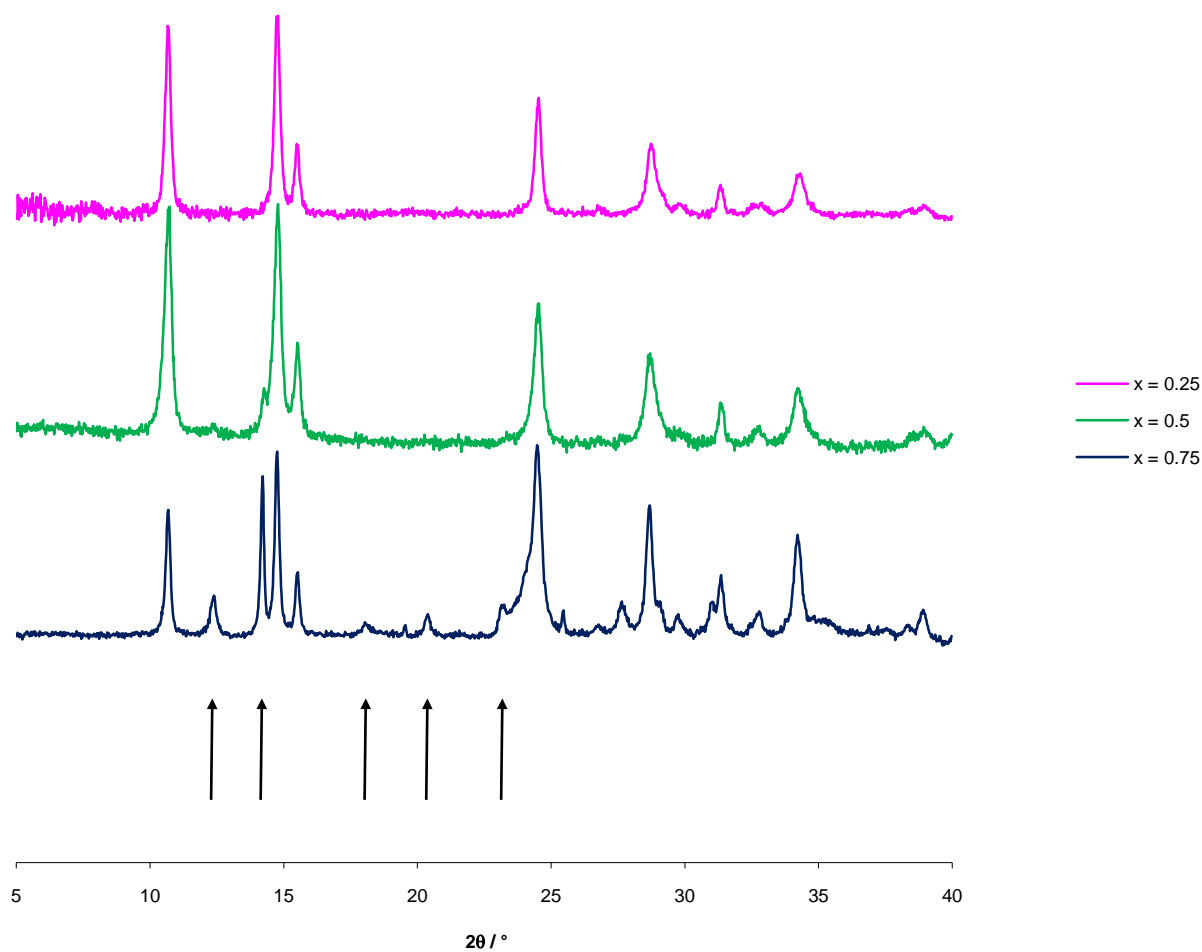

**Figure S4:** Comparison of PXRD patterns measured for  $4_x$  obtained by grinding 4,4'-bipy with cobalt and zinc chloride in a 1:3 ratio  $4_{0.75}$  (blue), in a 1:1 ratio  $4_{0.5}$  (green) and a 3:1 ratio  $4_{0.25}$  (pink). Peaks due to the tetrahedral  $Pnma$  polymorph  $4b$  are indicated by arrows, and others are due to the octahedral  $Pbn$  polymorph  $4c$ .

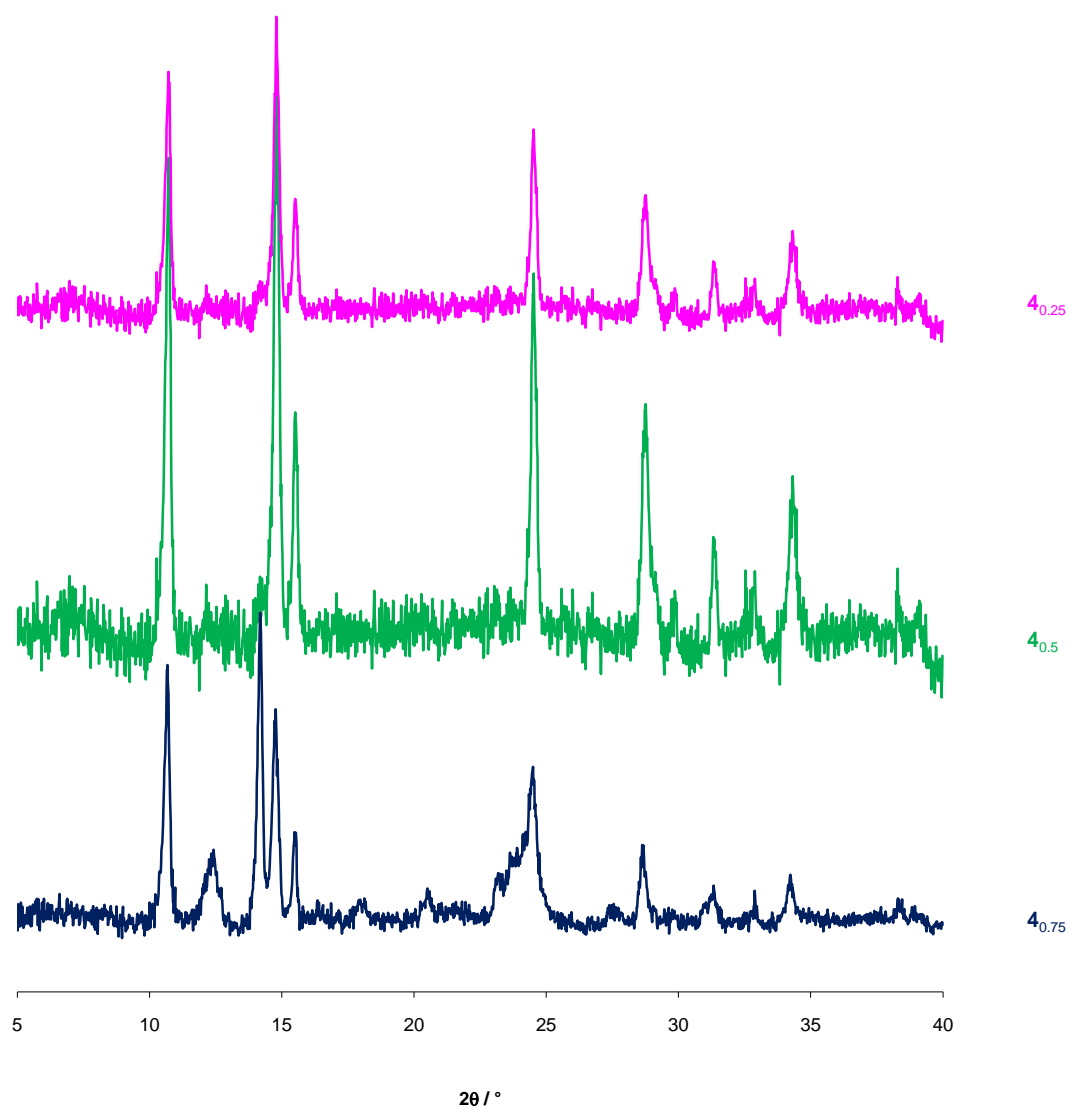

**Figure S5:** PXRD patterns for samples of  $[(4,4'\text{-bipy})\text{Co}_{1-x}\text{Zn}_x\text{Cl}_2]_n$   $4_x$  obtained by thermal elimination from  $[4,4'\text{-H}_2\text{bipy}][\text{Co}_{1-x}\text{Zn}_x\text{Cl}_4]$   $3_x$ : Co / Zn in 1:3 ratio  $4_{0.75}$  (blue); Co / Zn in 1:1 ratio  $4_{0.5}$  (green); Co / Zn in 3:1 ratio  $4_{0.25}$  (pink).

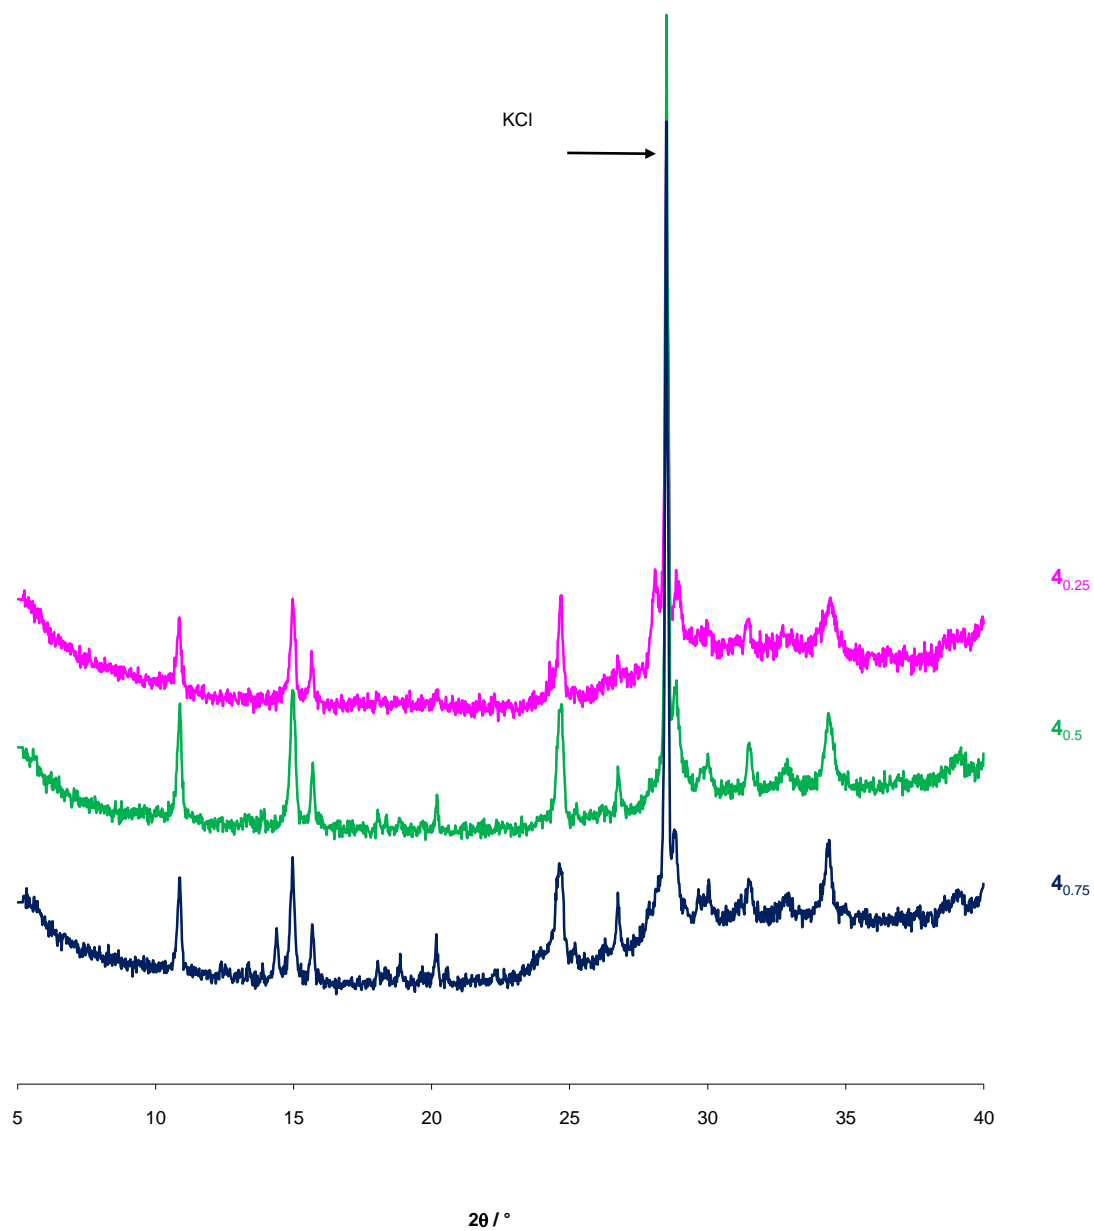

**Figure S6:** PXRd patterns for samples of  $[(4,4'\text{-bipy})\text{Co}_{1-x}\text{Zn}_x\text{Cl}_2]_n$   $4_x$  obtained by mechanochemical elimination from  $[4,4'\text{-H}_2\text{bipy}][\text{Co}_{1-x}\text{Zn}_x\text{Cl}_4]$   $3_x$ : Co / Zn in 1:3 ratio,  $4_{0.75}$  (blue); Co / Zn in 1:1 ratio,  $4_{0.5}$  (green); Co / Zn in 3:1 ratio,  $4_{0.25}$  (pink).

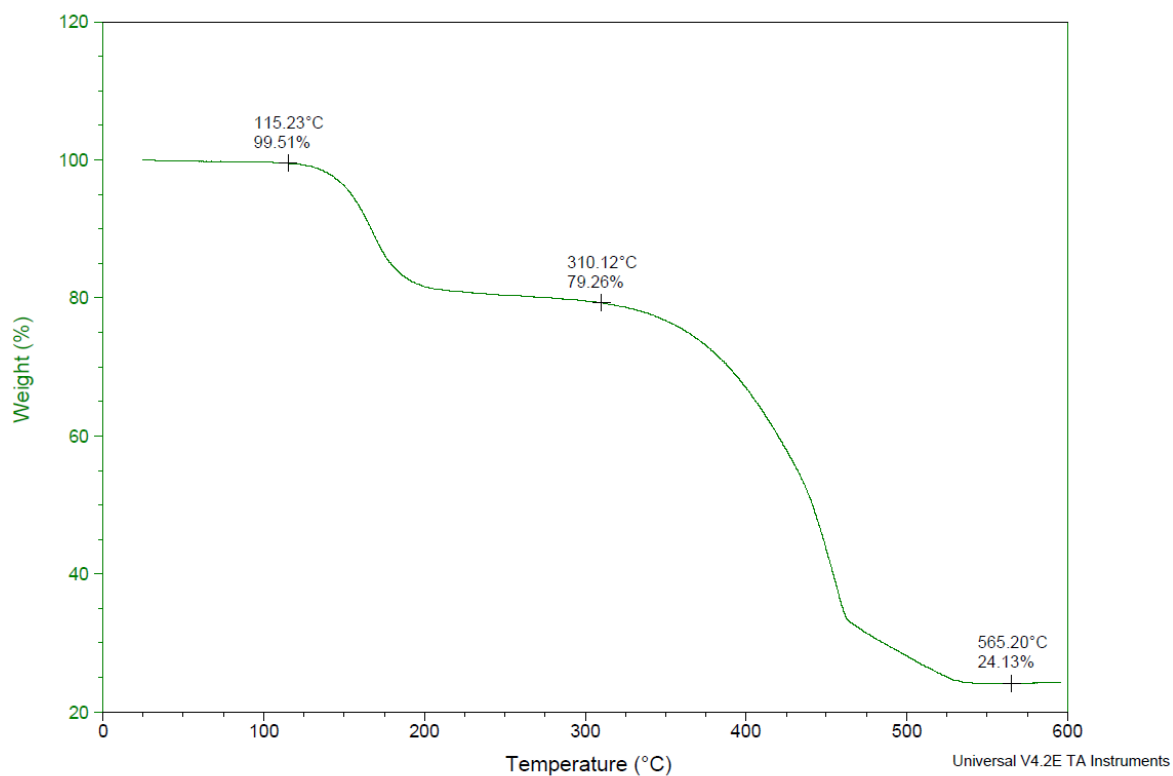

**Figure S7:** TGA of [4,4'-H<sub>2</sub>bipy][ZnCl<sub>4</sub>] (**3**). Size 3.769 mg Ramp 10.00 °C/min to 600.00 °C Balance Gas: Nitrogen 40.0 ml/min Sample Gas: Nitrogen 60.0 ml/min.



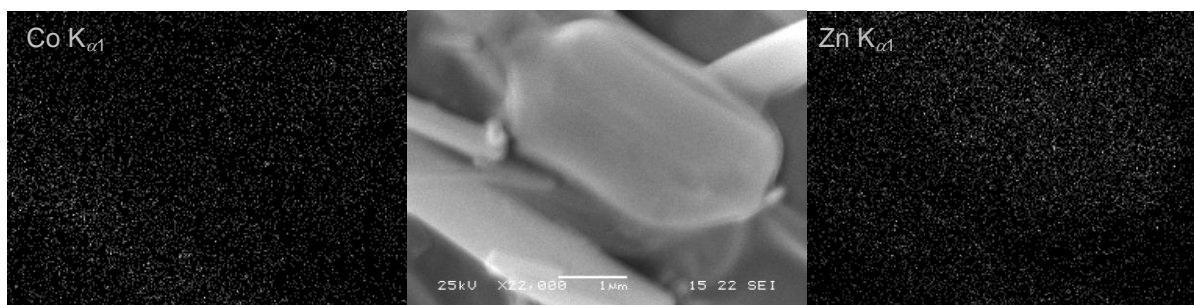

**Figure S8:** SEM images and Co K $\alpha_1$  and Zn K $\alpha_1$  EDAX map scans of  $[(4,4'\text{-bipy})\text{Co}_{0.5}\text{Zn}_{0.5}\text{Cl}_2]_n$  (**4<sub>0.5</sub>**) obtained by mixing 4,4'-bipy, CoCl $_2$  and ZnCl $_2$  in a 2:1:1 ratio in a solution of ethanol.

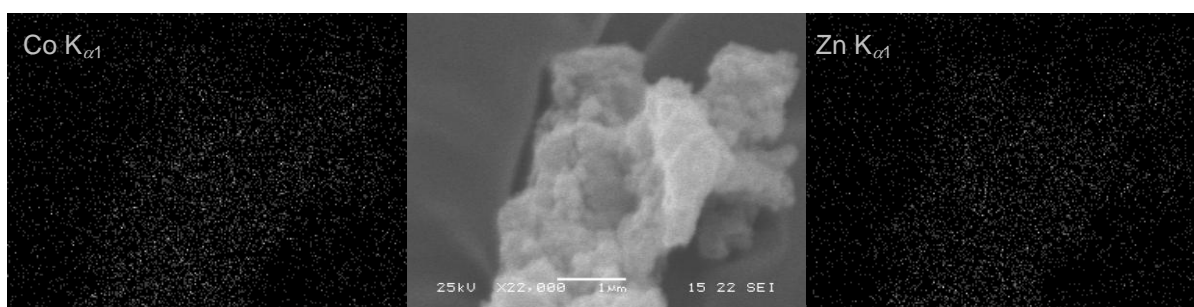

**Figure S9:** SEM images and Co K $\alpha_1$  and Zn K $\alpha_1$  EDAX map scans of  $[(4,4'\text{-bipy})\text{Co}_{0.5}\text{Zn}_{0.5}\text{Cl}_2]_n$  (**4<sub>0.5</sub>**) obtained by manually grinding 4,4'-bipy, CoCl $_2$  and ZnCl $_2$  in a 2:1:1 ratio with a drop of ethanol.

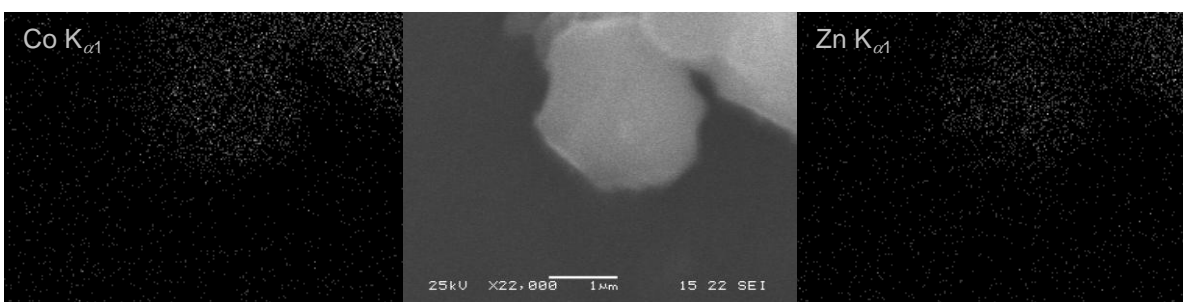

**Figure S10:** SEM images and Co K $\alpha_1$  and Zn K $\alpha_1$  EDAX map scans of  $[4,4'\text{-H}_2\text{bipy}][\text{Co}_{0.5}\text{Zn}_{0.5}\text{Cl}_4]$  (**3<sub>0.5</sub>**) obtained by grinding  $[4,4'\text{-H}_2\text{bipy}]\text{Cl}_2$ , CoCl $_2$  and ZnCl $_2$  in a 2:1:1 ratio.

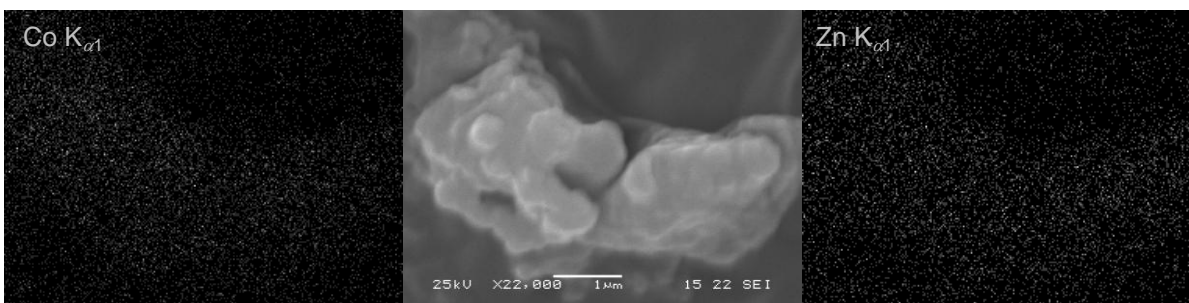

**Figure S11:** SEM images and Co K $\alpha_1$  and Zn K $\alpha_1$  EDAX map scans of  $[(4,4'\text{-bipy})\text{Co}_{0.5}\text{Zn}_{0.5}\text{Cl}_2]_n$  (**4<sub>0.5</sub>**) obtained by thermal elimination of 2 equivalents of HCl from  $[4,4'\text{-H}_2\text{bipy}][\text{Co}_{0.5}\text{Zn}_{0.5}\text{Cl}_4]$  (**3<sub>0.5</sub>**).

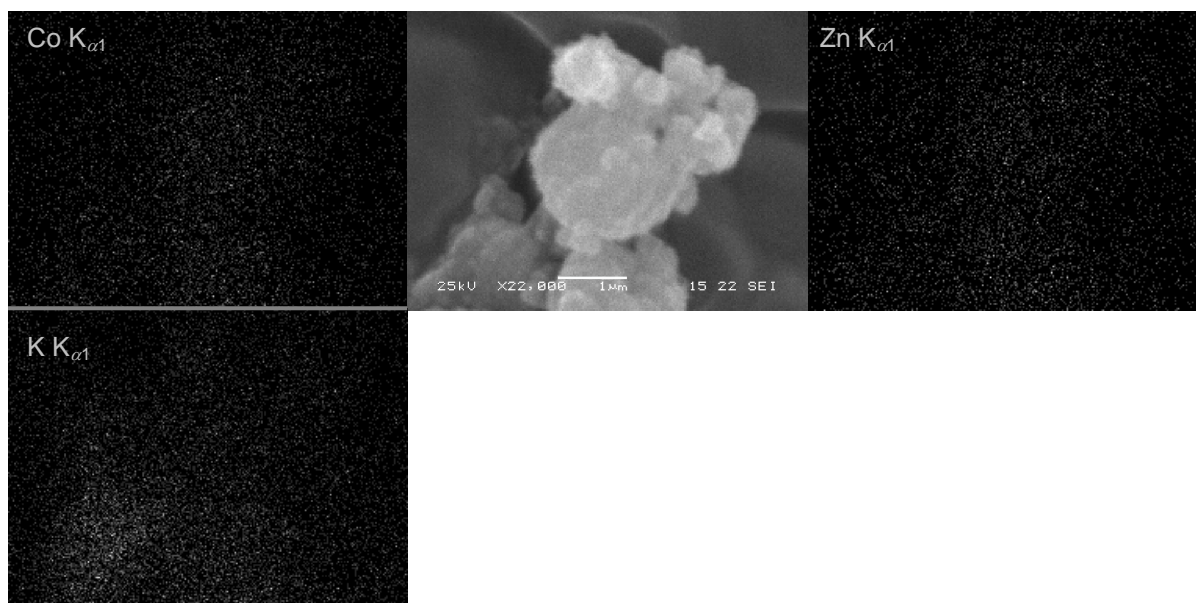

**Figure S12:**  $K_{\alpha 1}$  and  $K K_{\alpha 1}$  EDAX map scans of  $[(4,4'\text{-bipy})\text{Co}_{0.5}\text{Zn}_{0.5}\text{Cl}_2]_n$  ( $\mathbf{4}_{0.5}$ ) obtained by mechanochemical elimination of 2 equivalents of HCl from from  $[4,4'\text{-H}_2\text{bipy}][\text{Co}_{0.5}\text{Zn}_{0.5}\text{Cl}_4]$  ( $\mathbf{3}_{0.5}$ ).

| Compound reference                                                            | <b>3</b> <sub>0.86</sub>                                                                             | <b>3</b> <sub>0.93</sub>                                                                             | <b>3</b> <sub>0.95</sub>                                                                             |
|-------------------------------------------------------------------------------|------------------------------------------------------------------------------------------------------|------------------------------------------------------------------------------------------------------|------------------------------------------------------------------------------------------------------|
| Chemical formula                                                              | C <sub>10</sub> H <sub>10</sub> Cl <sub>4</sub> Co <sub>0.14</sub> N <sub>2</sub> Zn <sub>0.86</sub> | C <sub>10</sub> H <sub>10</sub> Cl <sub>4</sub> Co <sub>0.07</sub> N <sub>2</sub> Zn <sub>0.93</sub> | C <sub>10</sub> H <sub>10</sub> Cl <sub>4</sub> Co <sub>0.05</sub> N <sub>2</sub> Zn <sub>0.95</sub> |
| Formula Mass                                                                  | 364.48                                                                                               | 364.90                                                                                               | 364.90                                                                                               |
| Crystal system                                                                | Monoclinic                                                                                           | Monoclinic                                                                                           | Monoclinic                                                                                           |
| <i>a</i> /Å                                                                   | 7.6596(2)                                                                                            | 7.65960(10)                                                                                          | 7.6491(6)                                                                                            |
| <i>b</i> /Å                                                                   | 19.7497(7)                                                                                           | 19.7388(4)                                                                                           | 19.7209(16)                                                                                          |
| <i>c</i> /Å                                                                   | 9.4708(3)                                                                                            | 9.4616(2)                                                                                            | 9.4569(8)                                                                                            |
| <i>α</i> /°                                                                   | 90.00                                                                                                | 90.00                                                                                                | 90.00                                                                                                |
| <i>β</i> /°                                                                   | 109.067(2)                                                                                           | 109.0620(10)                                                                                         | 109.049(2)                                                                                           |
| <i>γ</i> /°                                                                   | 90.00                                                                                                | 90.00                                                                                                | 90.00                                                                                                |
| Unit cell volume/Å <sup>3</sup>                                               | 1354.09(7)                                                                                           | 1352.07(4)                                                                                           | 1348.43(19)                                                                                          |
| Temperature/K                                                                 | 120(2)                                                                                               | 120(2)                                                                                               | 120(2)                                                                                               |
| Space group                                                                   | <i>P</i> 2 <sub>1</sub> / <i>c</i>                                                                   | <i>P</i> 2 <sub>1</sub> / <i>c</i>                                                                   | <i>P</i> 2 <sub>1</sub> / <i>c</i>                                                                   |
| No. of formula units per unit cell, <i>Z</i>                                  | 4                                                                                                    | 4                                                                                                    | 4                                                                                                    |
| Absorption coefficient, μ/mm <sup>-1</sup>                                    | 2.504                                                                                                | 2.544                                                                                                | 2.473                                                                                                |
| No. of reflections measured                                                   | 14086                                                                                                | 17759                                                                                                | 12415                                                                                                |
| No. of independent reflections                                                | 3096                                                                                                 | 3100                                                                                                 | 3745                                                                                                 |
| <i>R</i> <sub>int</sub>                                                       | 0.0798                                                                                               | 0.0334                                                                                               | 0.0242                                                                                               |
| Final <i>R</i> <sub><i>I</i></sub> values ( <i>I</i> > 2σ( <i>I</i> ))        | 0.0629                                                                                               | 0.0216                                                                                               | 0.0221                                                                                               |
| Final <i>wR</i> ( <i>F</i> <sup>2</sup> ) values ( <i>I</i> > 2σ( <i>I</i> )) | 0.1203                                                                                               | 0.0489                                                                                               | 0.0575                                                                                               |
| Final <i>R</i> <sub><i>I</i></sub> values (all data)                          | 0.0915                                                                                               | 0.0253                                                                                               | 0.0228                                                                                               |
| Final <i>wR</i> ( <i>F</i> <sup>2</sup> ) values (all data)                   | 0.1352                                                                                               | 0.0503                                                                                               | 0.0580                                                                                               |
| Goodness of fit on <i>F</i> <sup>2</sup>                                      | 1.098                                                                                                | 1.080                                                                                                | 1.052                                                                                                |

**Table S1:** Details of the crystal structure determinations of **3**<sub>*x*</sub> with *x* = 0.95, 0.93 and 0.86
